# Supplementary material
Source: PubMed Central journal article supplement (PMC7289560)
Supplement: mmc1.pdf [file mmc1.pdf]

# THE LANCET

## Gastroenterology & Hepatology

### Supplementary appendix

This appendix formed part of the original submission and has been peer reviewed.  
We post it as supplied by the authors.

Supplement to: Lembach H, Hann A, McKay SC, et al. Resuming liver transplantation amid the COVID-19 pandemic. *Lancet Gastroenterol Hepatol* 2020; published online June 11. [https://doi.org/10.1016/S2468-1253\(20\)30187-4](https://doi.org/10.1016/S2468-1253(20)30187-4).

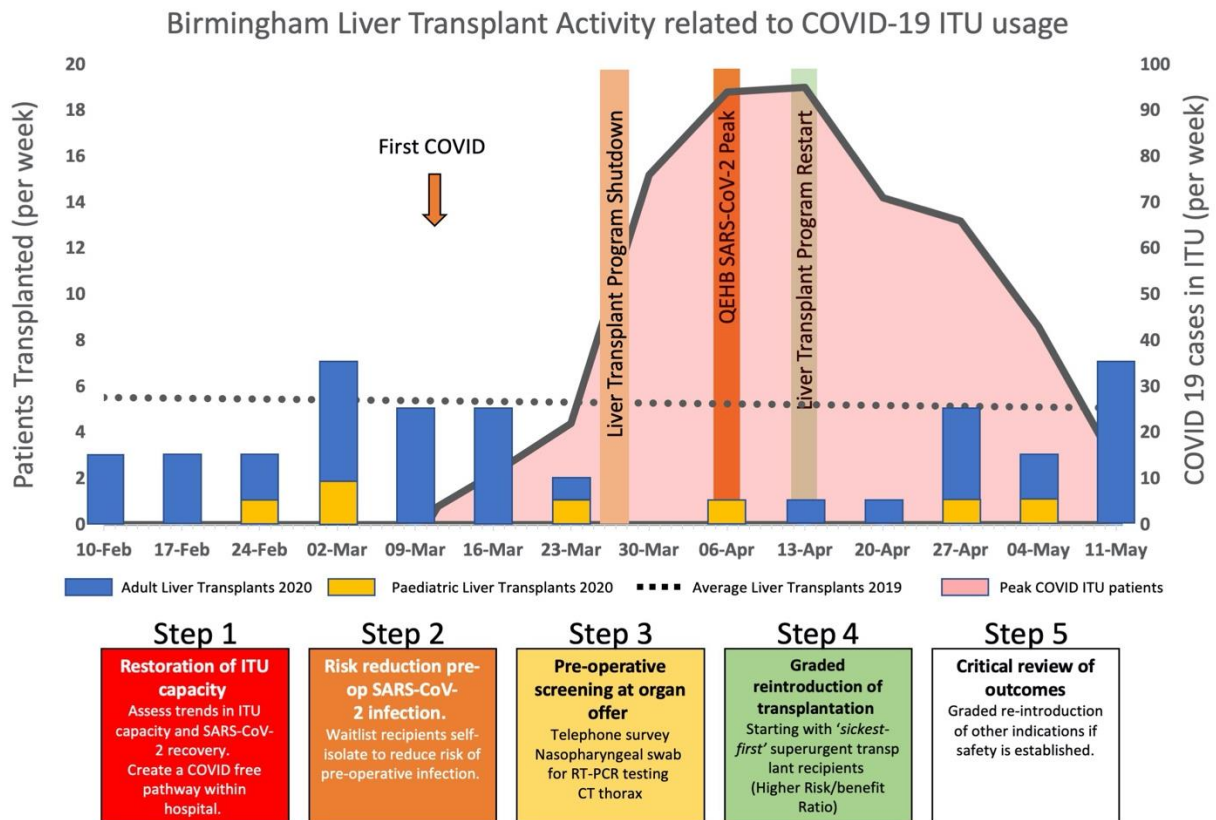

*Infographic and timeline representing the pre-pandemic weekly transplant case load and the impact of SARS-COV-2 on the transplant activity during the peak of the pandemic. The dates refer to the beginning of week. The strategic steps outlined in the bottom of the figure lead to the safe resumption of transplant activity*
